# Supplementary material
Source: Springer Nature journal article supplement (https://www.springermedizin.de/resource/supplementary/12958_2012_1114_MOESM16_ESM.pdf/9566844)

**Non castrated**

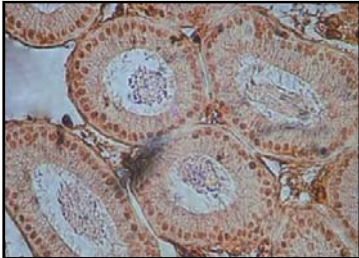

**3 d castration**

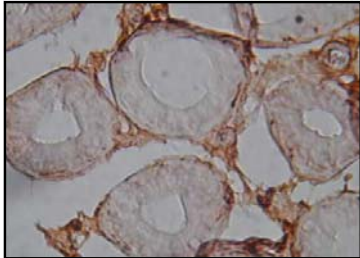

Supplement: MOESM16 [file 9566844]
